# Supplementary material for: Flagellin Improves the Immune Response of an Infectious Bursal Disease Virus (IBDV) Subunit Vaccine
Source: MDPI journal article supplement (doi:10.3390/vaccines10111780), 2022-10-22
Supplement: s1 [file s1]

Supplementary Material

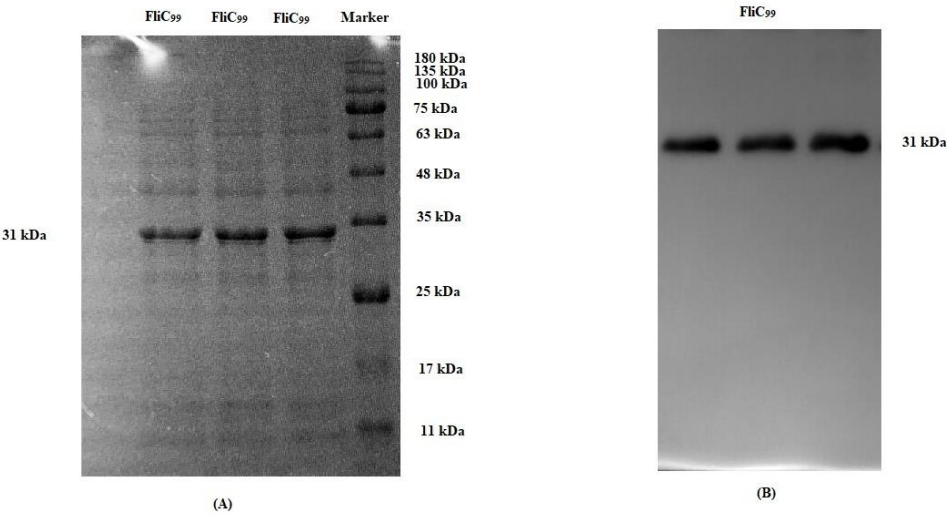

Figure S1: (A) Gel photo of the SDS-PAGE of the recombinant FliC<sub>99</sub>, (B) Western Blot membrane photo of the recombinant FliC<sub>99</sub>

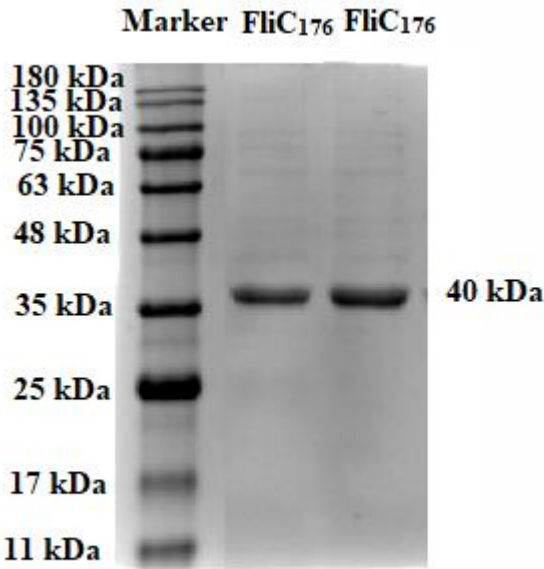

Figure S2: Gel photo of the SDS-PAGE of the recombinant FliC<sub>176</sub>

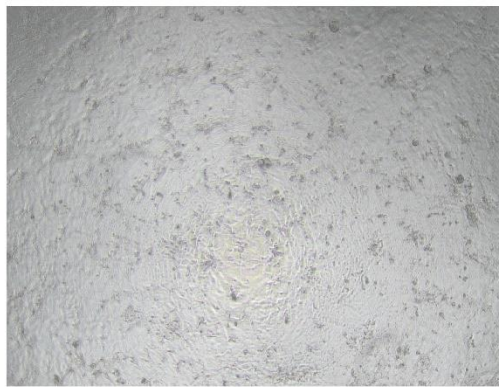

(A)

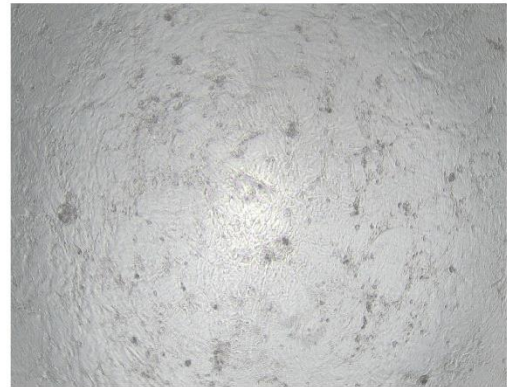

(B)

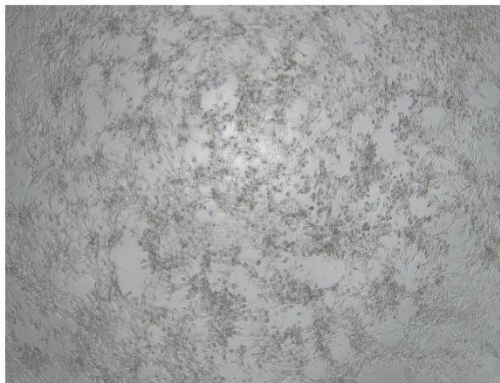

(C)

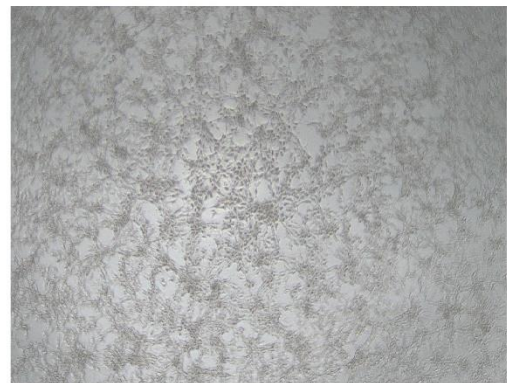

(D)

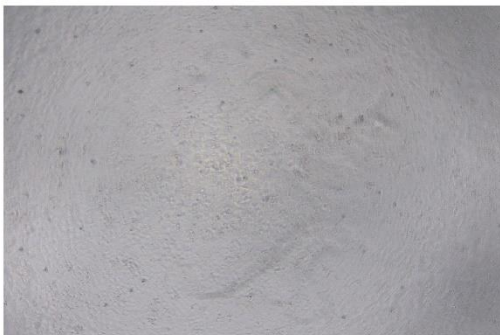

(E)

Figure S3: (A) Neutralization by FliC<sub>176</sub>-tVP2, (B) Neutralization by FliC<sub>99</sub>-tVP2 (C) Virus cytopathic effect (D) Positive Control (E) Negative Control
